# Supplementary material for: The Pore-Forming Hemolysin BL Enterotoxin from Bacillus cereus: Subunit Interactions in Cell-Free Systems
Source: MDPI journal article supplement (doi:10.3390/toxins13110807), 2021-11-15
Supplement: s1 [file s1]

# Supplementary Materials: The Pore-Forming Hemolysin BL Enterotoxin from *Bacillus cereus*: Subunit Interactions in Cell-Free Systems

Franziska Ramm, Marlitt Stech, Anne Zemella, Hendrik Frentzel and Stefan Kubick

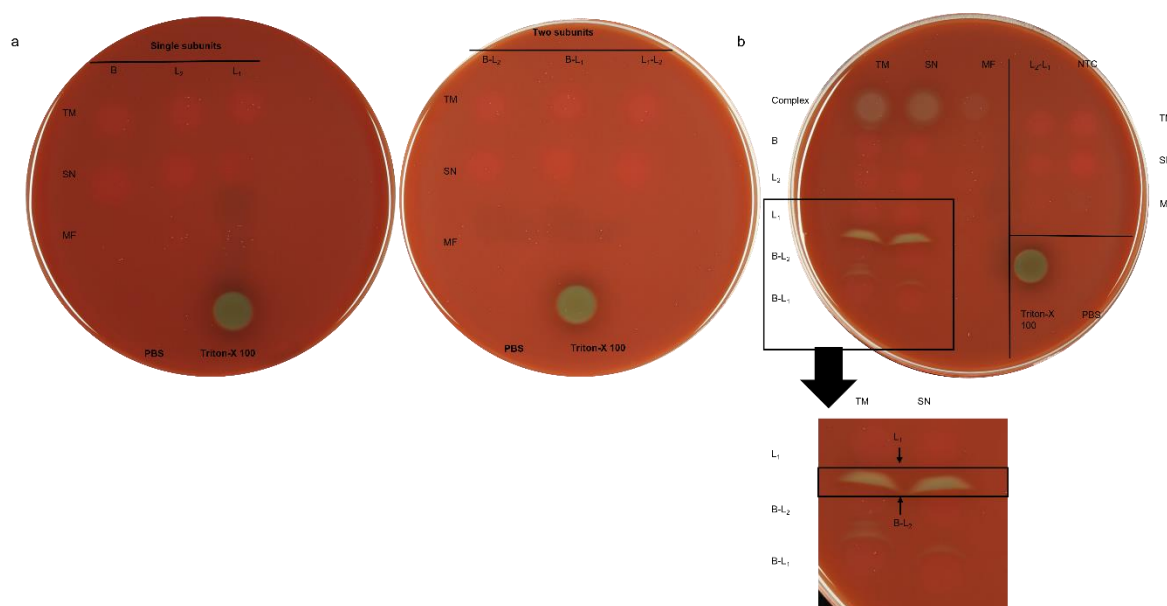

**Figure S1. Hemolytic assessment of Hbl subunits.** Hbl subunits B, L<sub>1</sub> and L<sub>2</sub> were synthesized in CHO lysate either separately or in a coexpression of either two or three subunits. (a) Uncropped 5% sheep blood agar plates from Figure 2 c. (b) Hemolytic activity of the single subunits and two coexpressed subunits was assessed on one single 5% sheep blood agar plate. Arrows indicating which subunit diffused in which direction.

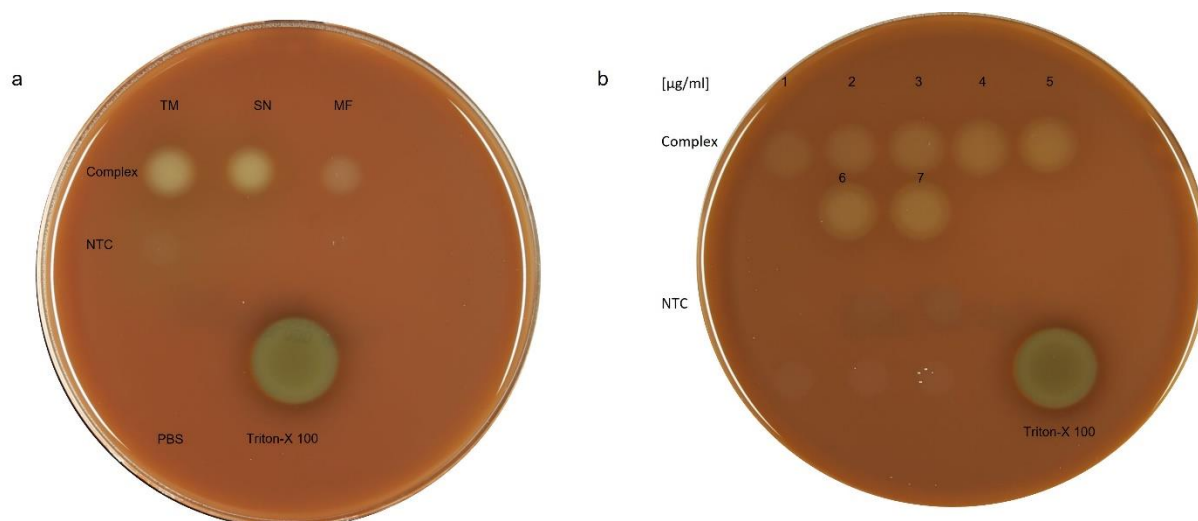

**Figure S2. Hemolytic assessment of Hbl complex.** Hbl subunits B, L<sub>1</sub> and L<sub>2</sub> were synthesized in CHO lysate in a coexpression of all three subunits. (a) Uncropped 5% sheep blood agar plate from Figure 2 d. (b) Hemolytic activity of the coexpressed tripartite Hbl enterotoxin assessed on 5% sheep blood agar plate in a concentration range from 1 to 7 µg/ml.

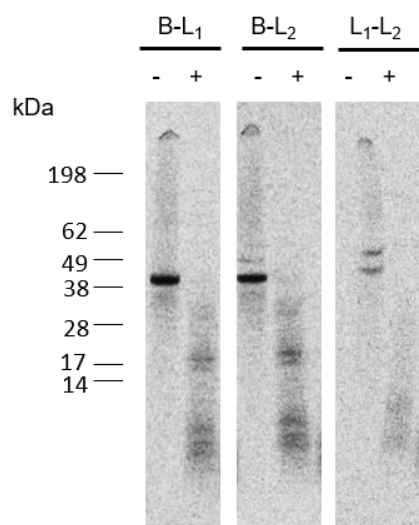

**Figure S3. Proteinase K digestion.** Autoradiograph showing  $^{14}\text{C}$ -leucine labeled coexpressed subunits when synthesized using molar plasmid ratio of 1:1 before (–) and after (+) a proteinase K digestion.

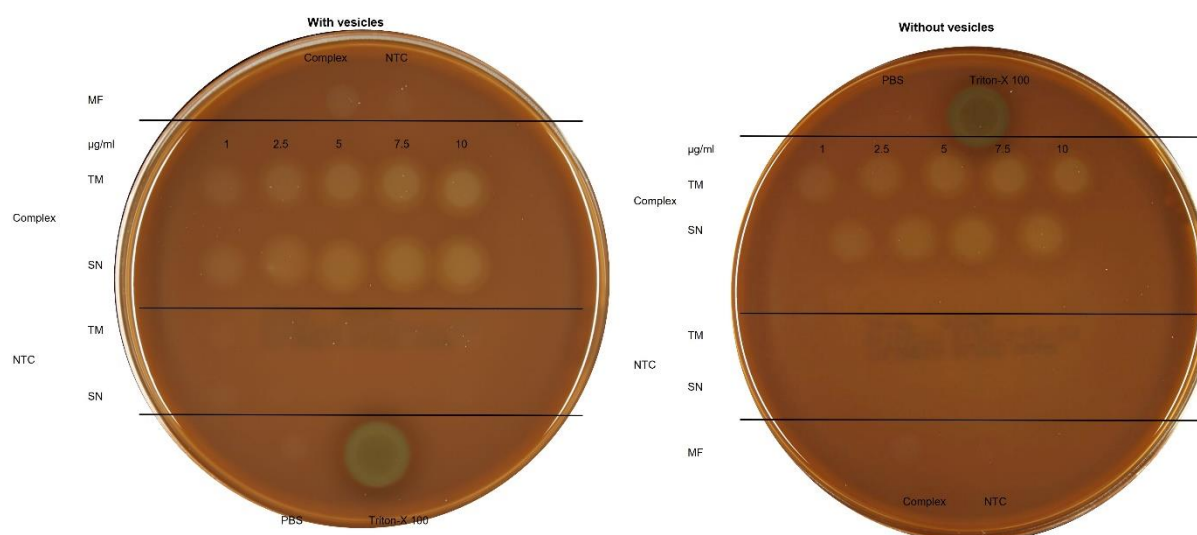

**Figure S4.** Uncropped 5% sheep blood agar plates from Figure 3.

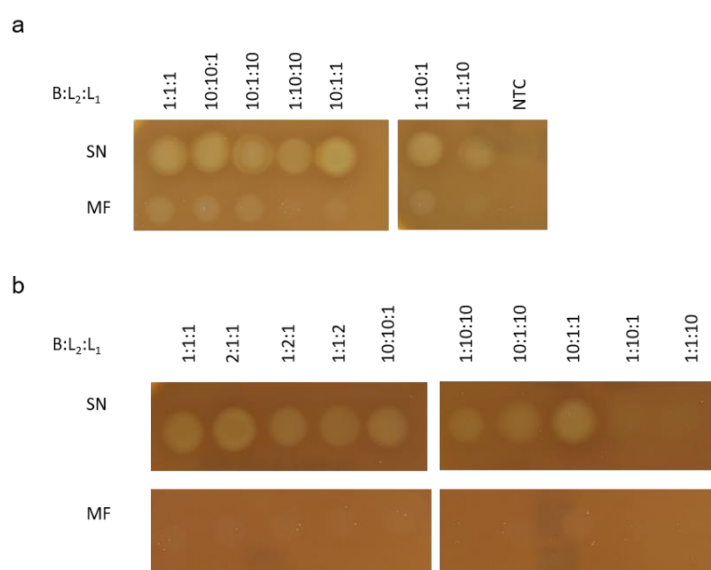

**Figure S5. Analysis of subunit interaction at different molar ratios.** Hemolytic activity was assessed on 5% sheep blood agar plates. (a) Hbl subunits B, L<sub>2</sub> and L<sub>1</sub> were coexpressed in CHO lysate using different molar plasmid ratios. (b) Hbl subunits were expressed separately in CHO lysate. Subsequently, fractions of each subunit in SN and MF were mixed in different molar protein ratios.

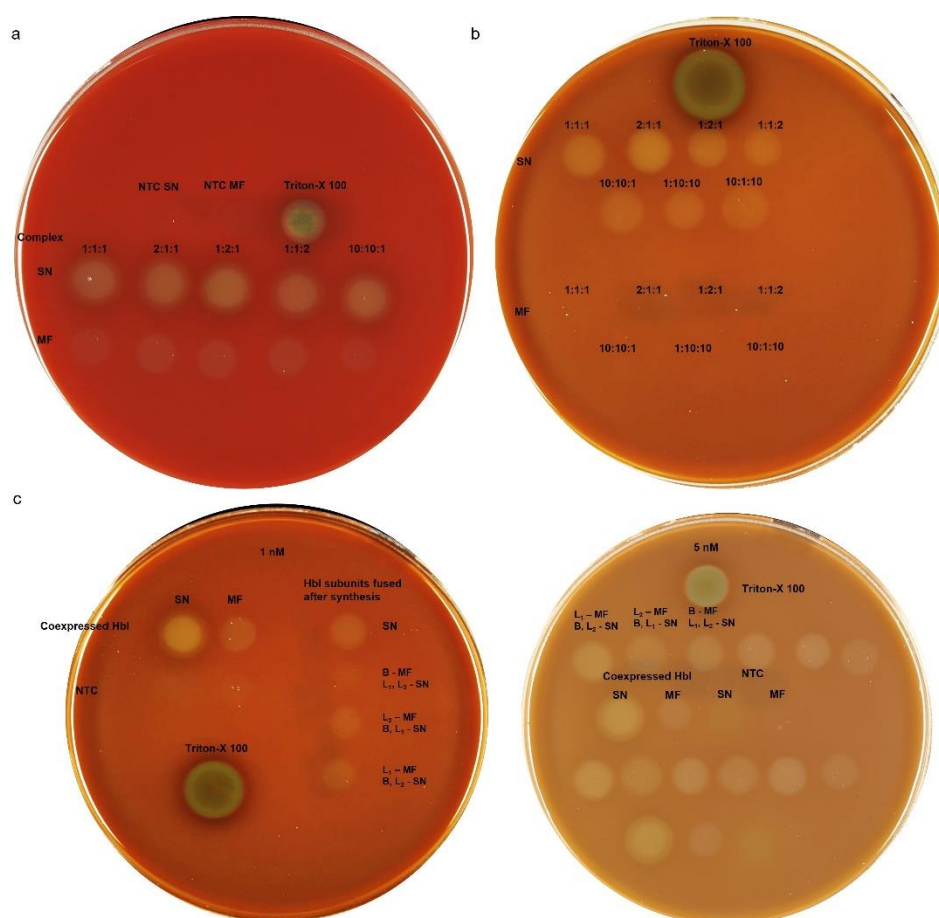

**Figure S6.** Uncropped 5% sheep blood agar plates from Figure 4.

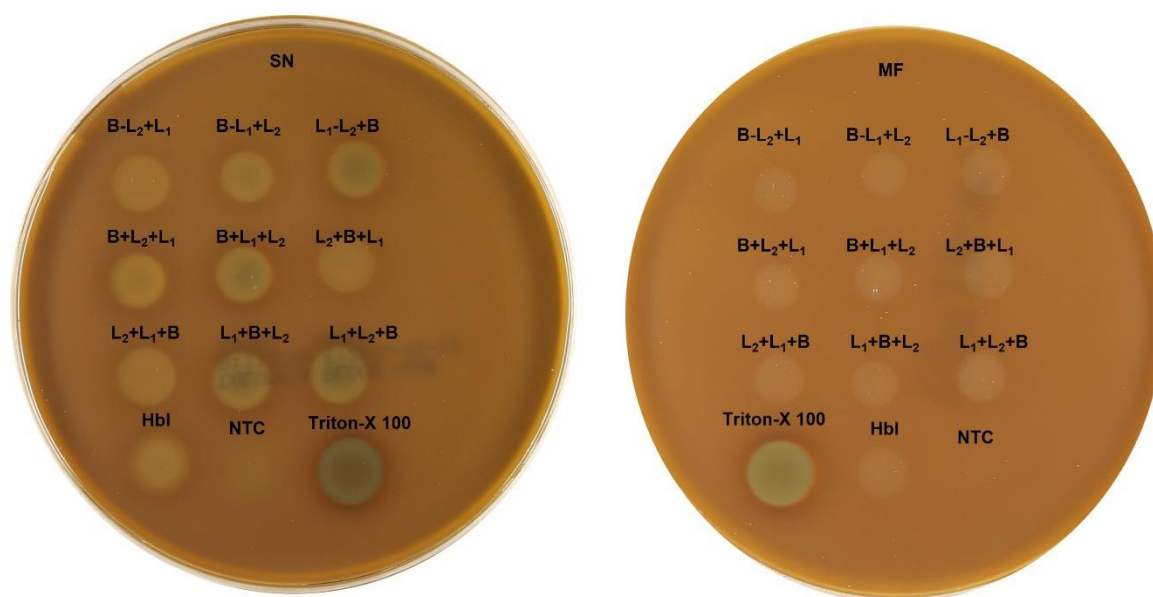

**Figure S7.** Uncropped 5% sheep blood agar plates from Figure 5.

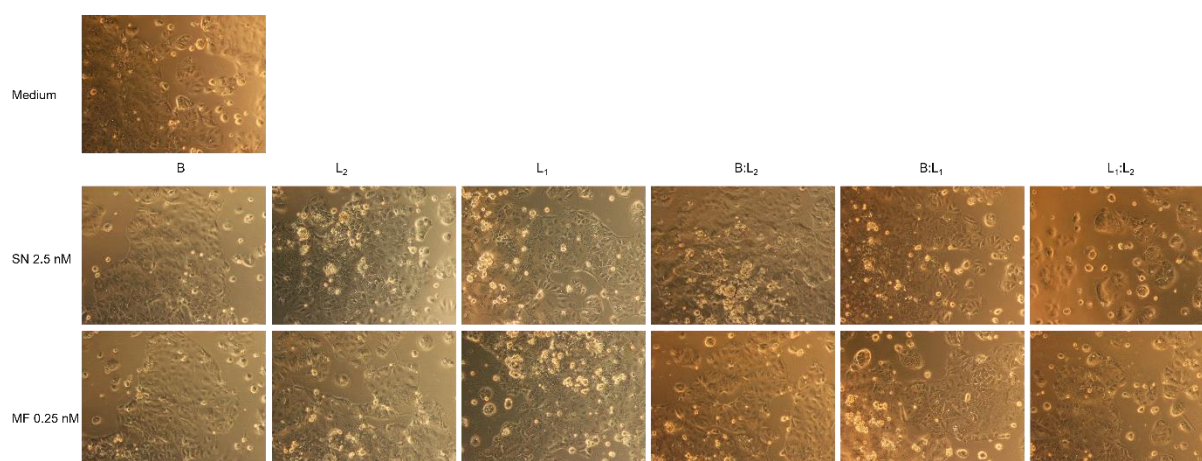

**Figure S8. Morphological analysis of CaCo2 cells.** Hbl single subunits or two coexpressed subunits were synthesized in a CHO lysate and added to CaCo2 cells. The SN fraction was applied at 2.5 nM while the MF fraction was applied at 0.25 nM. 4 h after incubation morphological changes were analyzed using a light microscope. Phase contrast micrographs were captured with a CCD camera (Nikon).

**Table S1.** Summary of acquired Data: Hemolytic activity of Hbl.

✓ = present, - = not present, n.d.a. = no data available.

| Characteristic     | Fraction | B | L <sub>1</sub> | L <sub>2</sub> | Hbl Complex                                     |                         |                                      |
|--------------------|----------|---|----------------|----------------|-------------------------------------------------|-------------------------|--------------------------------------|
|                    |          |   |                |                | Combination (B:L <sub>2</sub> :L <sub>1</sub> ) | Coexpression            | Single subunit expression and fusion |
| Hemolytic activity | SN       | - | -              | -              | 1:1:1                                           | ✓                       | ✓                                    |
|                    |          |   |                |                | 2:1:1                                           | ✓                       | ✓                                    |
|                    |          |   |                |                | 1:2:1                                           | ✓                       | ✓                                    |
|                    |          |   |                |                | 1:1:2                                           | ✓                       | ✓                                    |
|                    |          |   |                |                | 10:10:1                                         | ✓                       | ✓                                    |
|                    |          |   |                |                | 10:1:10                                         | ✓                       | ✓                                    |
|                    |          |   |                |                | 1:10:10                                         | ✓                       | ✓                                    |
|                    |          |   |                |                | 10:1:1                                          | ✓                       | ✓                                    |
|                    |          |   |                |                | 1:10:1                                          | ✓                       | -                                    |
|                    |          |   |                |                | 1:1:10                                          | weak                    | -                                    |
|                    | MF       | - | -              | -              | 1:1:1                                           | ✓                       | (weak)                               |
|                    |          |   |                |                | 2:1:1                                           | Concentration dependent | (weak)                               |
|                    |          |   |                |                | 1:2:1                                           | Concentration dependent | (weak)                               |
|                    |          |   |                |                | 1:1:2                                           | Concentration dependent | (weak)                               |
|                    |          |   |                |                | 10:10:1                                         | ✓                       | (weak)                               |
|                    |          |   |                |                | 10:1:10                                         | ✓                       | -                                    |
|                    |          |   |                |                | 1:10:10                                         | weak                    | -                                    |
|                    |          |   |                |                | 10:1:1                                          | weak                    | weak                                 |
|                    |          |   |                |                | 1:10:1                                          | ✓                       | -                                    |
|                    |          |   |                |                | 1:1:10                                          | -                       | -                                    |
| Crescent formation | SN       |   | ✓              |                |                                                 | n.d.a.                  |                                      |
|                    | MF       |   | -              |                |                                                 | n.d.a.                  |                                      |

**Table S2.** Summary of acquired Data: Cytotoxic activity of Hbl.  
 = present, - = not present, n.d.a. = no data available.

| Characteristic        | Fraction | B                                                                                 | L <sub>1</sub> | L <sub>2</sub> | Hbl Complex                                        |                                                                                     |                                            |
|-----------------------|----------|-----------------------------------------------------------------------------------|----------------|----------------|----------------------------------------------------|-------------------------------------------------------------------------------------|--------------------------------------------|
|                       |          |                                                                                   |                |                | Combination<br>(B:L <sub>2</sub> :L <sub>1</sub> ) | Coexpression                                                                        | Single subunit<br>expression and<br>fusion |
| Membrane<br>embedding | MF       |  | -              | -              |                                                    |  | n.d.a.                                     |
| Membrane<br>integrity | SN       | Interaction with cell<br>membrane detected                                        |                |                | 1:1:1                                              |  | n.d.a.                                     |
|                       | MF       | -                                                                                 | -              | -              | 1:1:1                                              |  | n.d.a.                                     |
| Cytotoxicity          | SN       | -                                                                                 | -              | -              | 1:1:1                                              |  | n.d.a.                                     |
|                       | MF       | -                                                                                 | -              | -              | 1:1:1                                              |  | n.d.a.                                     |
